# Supplementary material
Source: PubMed Central journal article supplement (PMC3846091)
Supplement: NIHMS528829-supplement-1_si_001.pdf [file NIHMS528829-supplement-1_si_001.pdf]

# Effects of Macromolecular Crowding on the Conformational Ensembles of Disordered Proteins

*Sanbo Qin and Huan-Xiang Zhou\**

Department of Physics and Institute of Molecular Biophysics, Florida State University, Tallahassee, FL  
32306, USA

Supporting Information

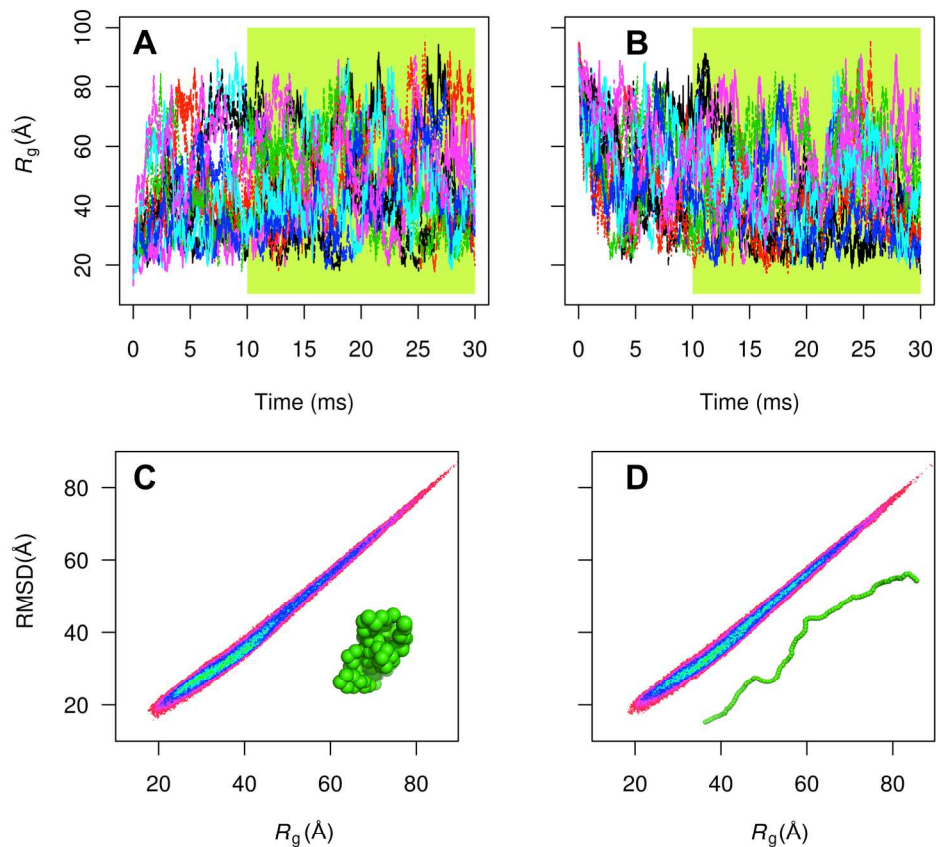

**Figure S1.** Comparison of conformational sampling in two sets of trajectories ( $\xi = 0.7$ ). Each set consists of 36 repeat trajectories that were started either from a compact (panels **A** and **C**) or an extended (panels **B** and **D**) conformation for the IDP. (**A**) and (**B**) Instantaneous  $R_g$  values along the 36 trajectories. Shaded regions are used for calculating averages. (**C**) and (**D**) 2-d histograms in  $R_g$  and RMSD; the latter refers to root-mean-square-deviation from the compact initial conformation.

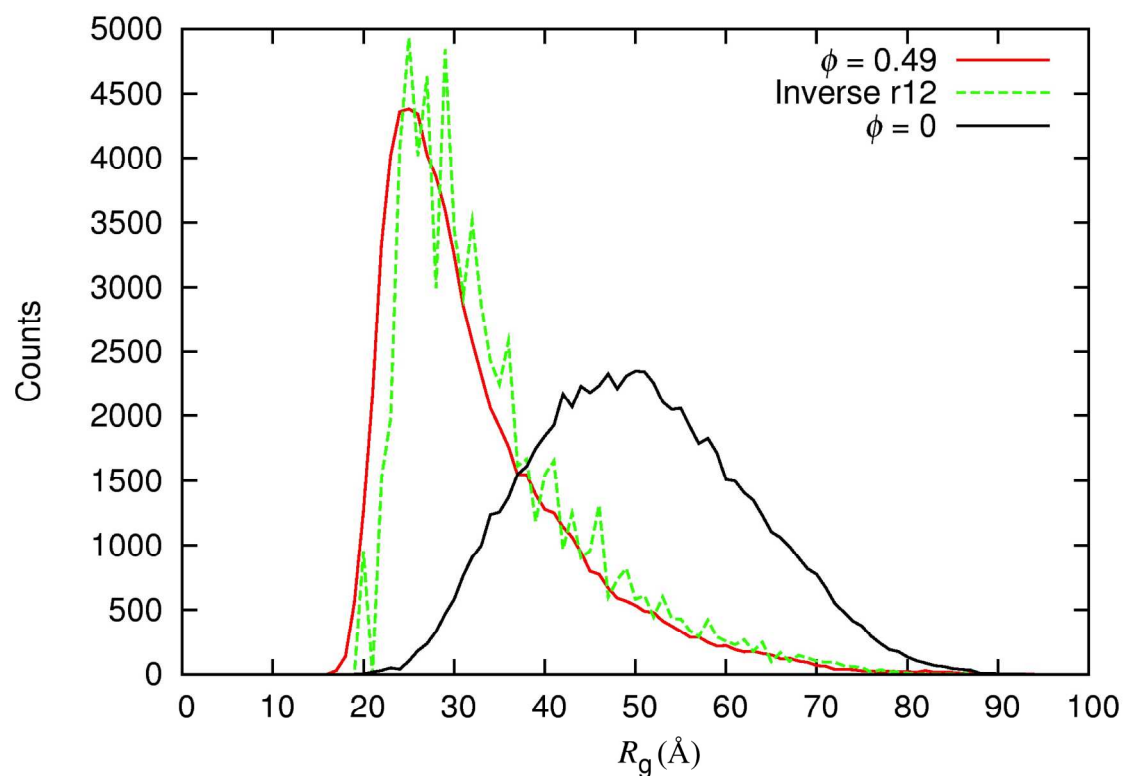

**Figure S2.** Histograms of  $R_g$  from direct simulations at  $\phi = 0.49$  and predicted by postprocessing the crowder-free simulations (with  $\phi = 0$ ), with  $\Delta\mu$  calculated by exact treatment of the inverse  $r^{12}$  form of protein-crowder interactions. Under-sampling of conformations with  $R_g$  around 20  $\text{\AA}$  by the crowder-free simulations leads a slight overestimate of  $R_{g,\text{rms}}$ .

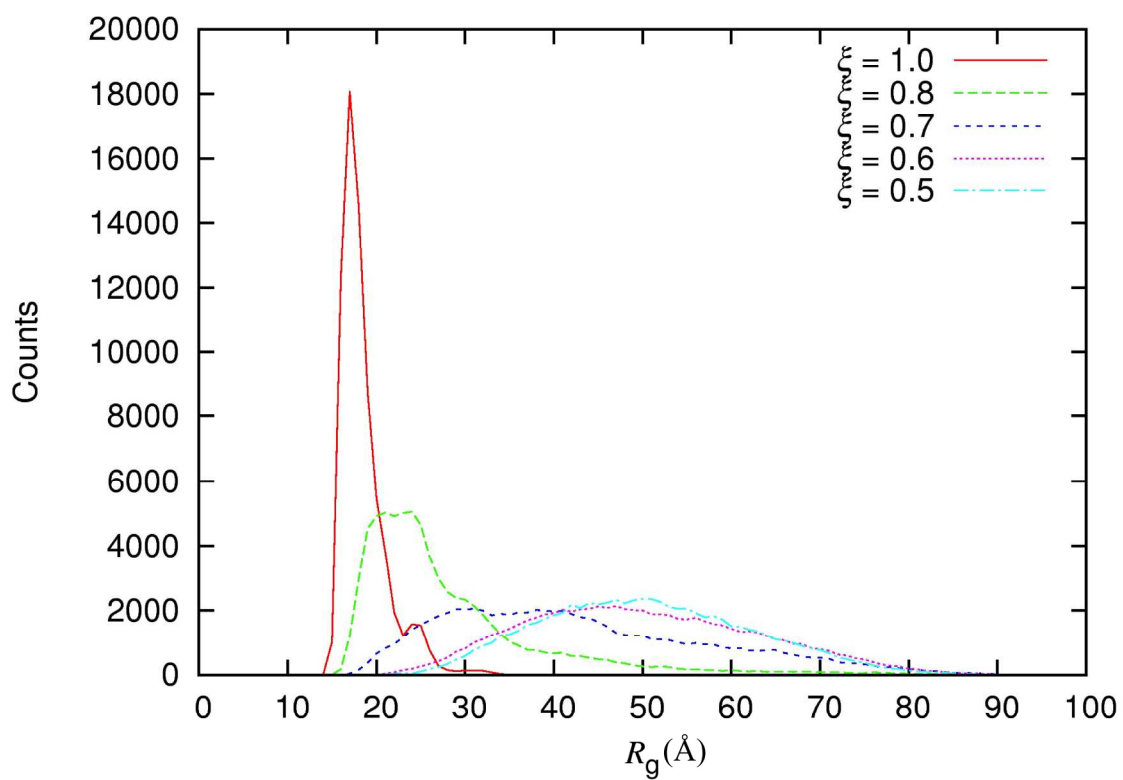

**Figure S3.** Histograms of  $R_g$  for the IDP with different  $\xi$  at  $\phi = 0$ .

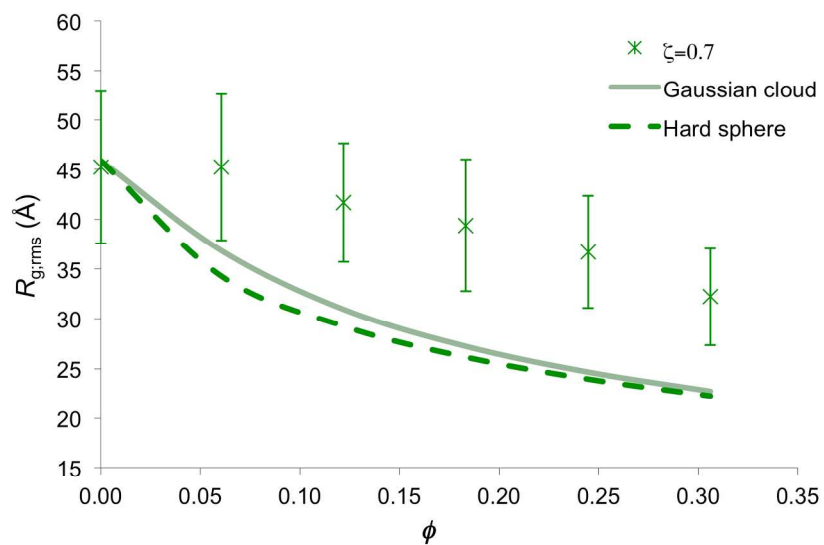

**Figure S4.** Comparison of  $R_{g,rms}$  obtained from the direct simulations at  $\zeta = 0.7$  and predicted by the Gaussian cloud and equivalent hard sphere models of Minton.

**TABLE S1: Standard Deviations of  $R_g$  (in Å) After Combining 36 Direct-Simulation Trajectories**

| $\phi$ | 0.00 | 0.06 | 0.12 | 0.18 | 0.24 | 0.31 | 0.37 | 0.43 | 0.49 |
|--------|------|------|------|------|------|------|------|------|------|
| $\xi$  |      |      |      |      |      |      |      |      |      |
| 1.0    | 2.6  | 2.4  | 2.4  | 2.3  | 2.1  | 2.2  | 2.4  | 1.8  | 1.5  |
| 0.8    | 10.6 | 8.2  | 8.0  | 7.8  | 6.7  | 4.3  | 4.3  | 3.4  | 2.8  |
| 0.7    | 14.8 | 15.3 | 13.5 | 13.2 | 12.6 | 10.6 | 8.8  | 5.7  | 4.3  |
| 0.6    | 12.9 | 12.8 | 13.5 | 13.7 | 13.7 | 12.9 | 11.6 | 9.3  | 7.1  |
| 0.5    | 11.8 | 11.8 | 11.9 | 12.1 | 12.6 | 11.9 | 12.0 | 10.3 | 10.4 |
